# Supplementary material for: Cell Dome as an Evaluation Platform for Organized HepG2 Cells
Source: MDPI journal article supplement (doi:10.3390/cells12010069), 2022-12-23
Supplement: s1 [file s1]

*Supplementary Information*

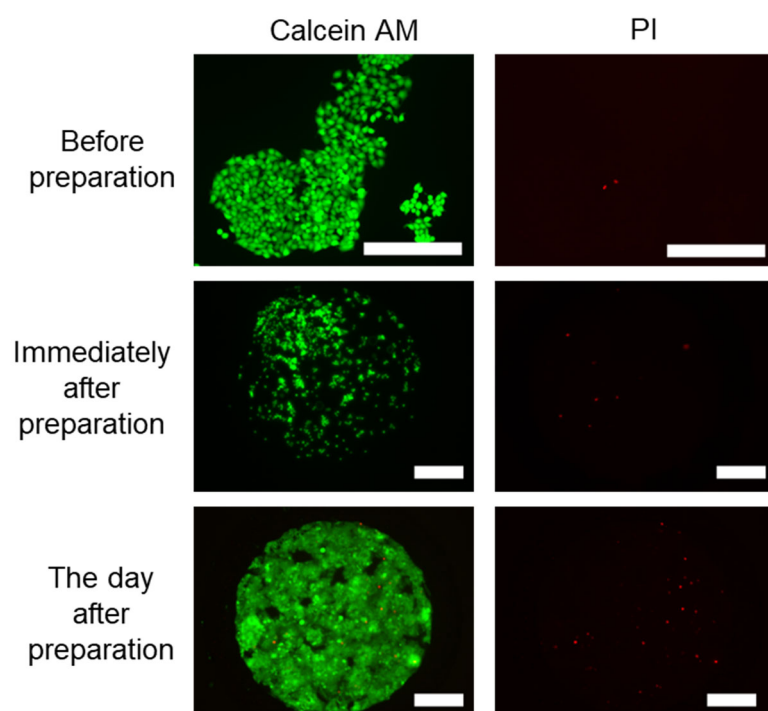

**Figure S1.** HepG2 cells before enclosing and, immediately and a day after enclosing stained with Calcein AM and PI indicating live and dead cells, respectively (Bars: 250  $\mu$ m).
